# Supplementary material
Source: Royal Society of Chemistry journal article supplement (doi:10.1039/d6en00115g)
Supplement: d6en00115g1.pdf [file d6en00115g1.pdf]

Supplementary Material for

**Oxidation regulation mechanism of air nano-bubbles and application in sulfide removal  
from industrial wastewater**

Wenhu Tang<sup>a</sup>, Chen Yang<sup>a</sup>, Yuan Huang<sup>a,\*</sup>, Yue Wu<sup>a</sup>, Xing Chen<sup>b,c</sup>, Zhongyuan Li<sup>b,c</sup>, Tao Li<sup>a</sup>,  
Hui Li<sup>a,\*</sup>

<sup>a</sup> Institute of Environmental Pollution and Health, School of Environmental and Chemical  
Engineering, Shanghai University, Shanghai 200444, PR China

<sup>b</sup> China Construction 8th Engineering Division Corp., LTD, Shanghai, 200122, China

<sup>c</sup> CSCEC 8th Division Environmental Technology CO., LTD, Shanghai, 200444, China

\* Corresponding Authors: Yuan Huang      Email: [yuan\\_huang@shu.edu.cn](mailto:yuan_huang@shu.edu.cn);

Hui Li      Email: [huili2018@shu.edu.cn](mailto:huili2018@shu.edu.cn)

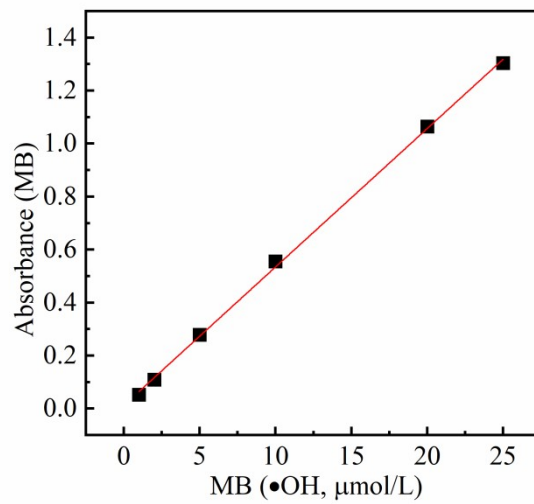

**Fig. S1 Calibration curve for ·OH quantification via methylene blue (MB) consumption.**

**Standard MB solutions (1, 2, 5, 10, 20, 25 μmol/L) were analyzed by UV-Vis spectrophotometry at 664 nm.**

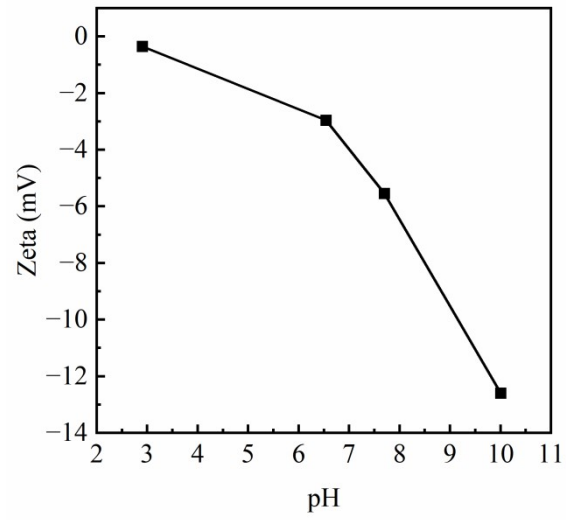

**Fig. S2 Effect of pH on Zeta potential of micro-nanobubbles (MNBs). Zeta potential was measured using a Malvern Zetasizer Nano after 30 min of MNB generation.**

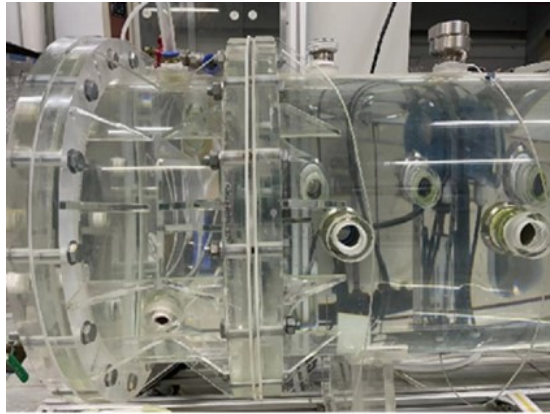

$Q_g/Q_l=1\%$

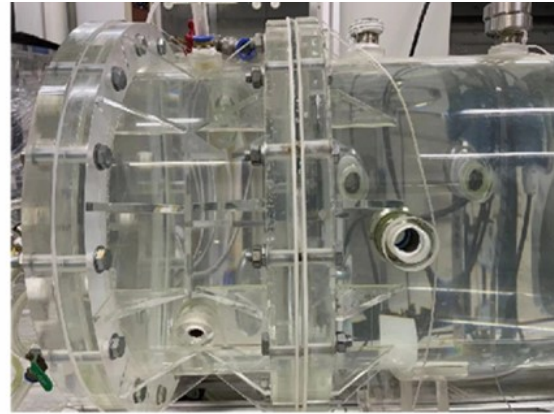

$Q_g/Q_l=2\%$

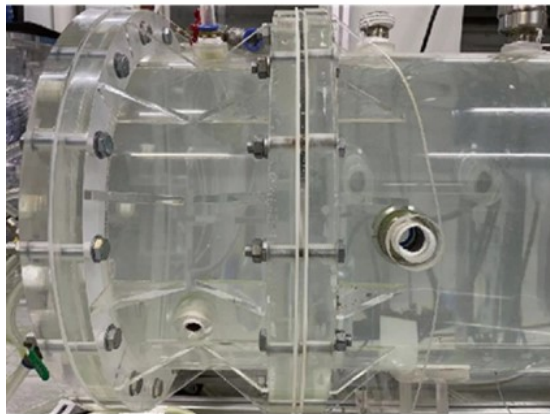

$Q_g/Q_l=3\%$

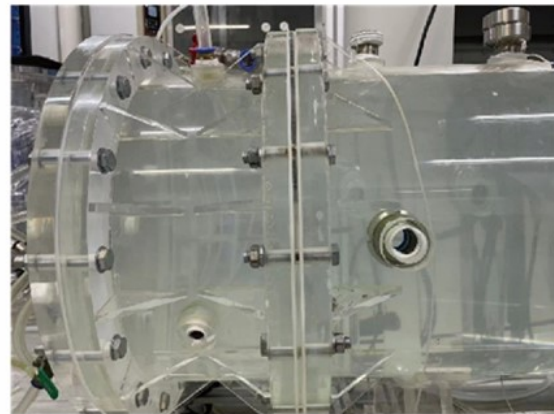

$Q_g/Q_l=4\%$

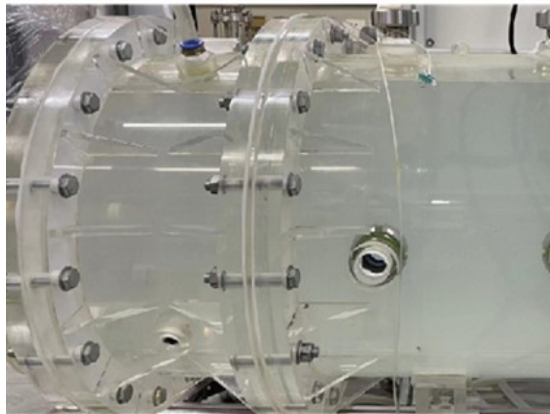

$Q_g/Q_l=5\%$

Fig. S3 Visual diagram of bubble tank turbidity under different gas-liquid ratios.

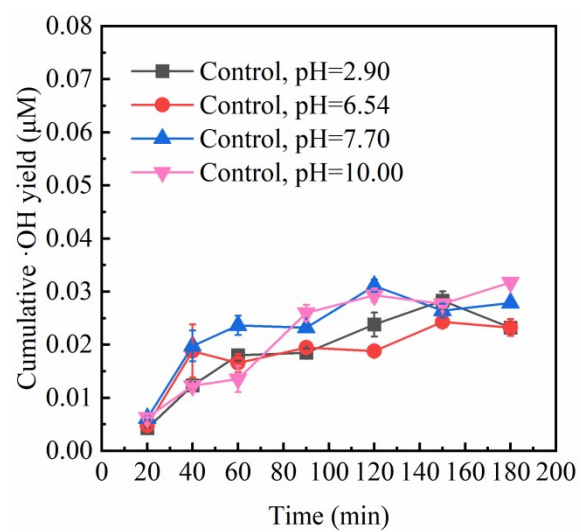

**Fig. S4 Cumulative  $\cdot\text{OH}$  yield in non-aerated tap water under different initial pH conditions. (Error bars represent the standard deviation derived from three independent experimental runs.)**
